# Supplementary material for: NMR Studies of Two Lysine Based Dendrimers with Insertion of Similar Histidine-Arginine and Arginine-Histidine Spacers Having Different Properties for Application in Drug Delivery
Source: MDPI journal article supplement (doi:10.3390/ijms24020949), 2023-01-04
Supplement: s1 [file s1]

## SUPPLEMENTARY MATERIALS

### NMR studies of peptide dendrimers with Histidine-Arginine (Lys-His-Arg) and Arginine-Histidine (Lys-Arg-His) Spacers

Nadezhda N. Sheveleva,<sup>1</sup> Irina I. Tarasenko,<sup>2</sup> Mikhail A. Vovk,<sup>1</sup> Mariya E. Mikhailova,<sup>1</sup> Igor M. Neelov,<sup>3</sup> Denis A. Markelov<sup>1</sup>

<sup>1</sup>*Saint Petersburg State University, 7/9 Universitetskaya nab, 199034 Saint Petersburg, Russia*

<sup>2</sup>*Institute of Macromolecular Compounds, Russian Academy of Sciences, Bolshoi Prospekt 31, V.O., 199004 Saint Petersburg, Russia*

<sup>3</sup>*Saint Petersburg National Research University of Information Technologies, Mechanics and Optics (ITMO University), Kronverkskiy pr. 49, 197101 Saint Petersburg, Russia*

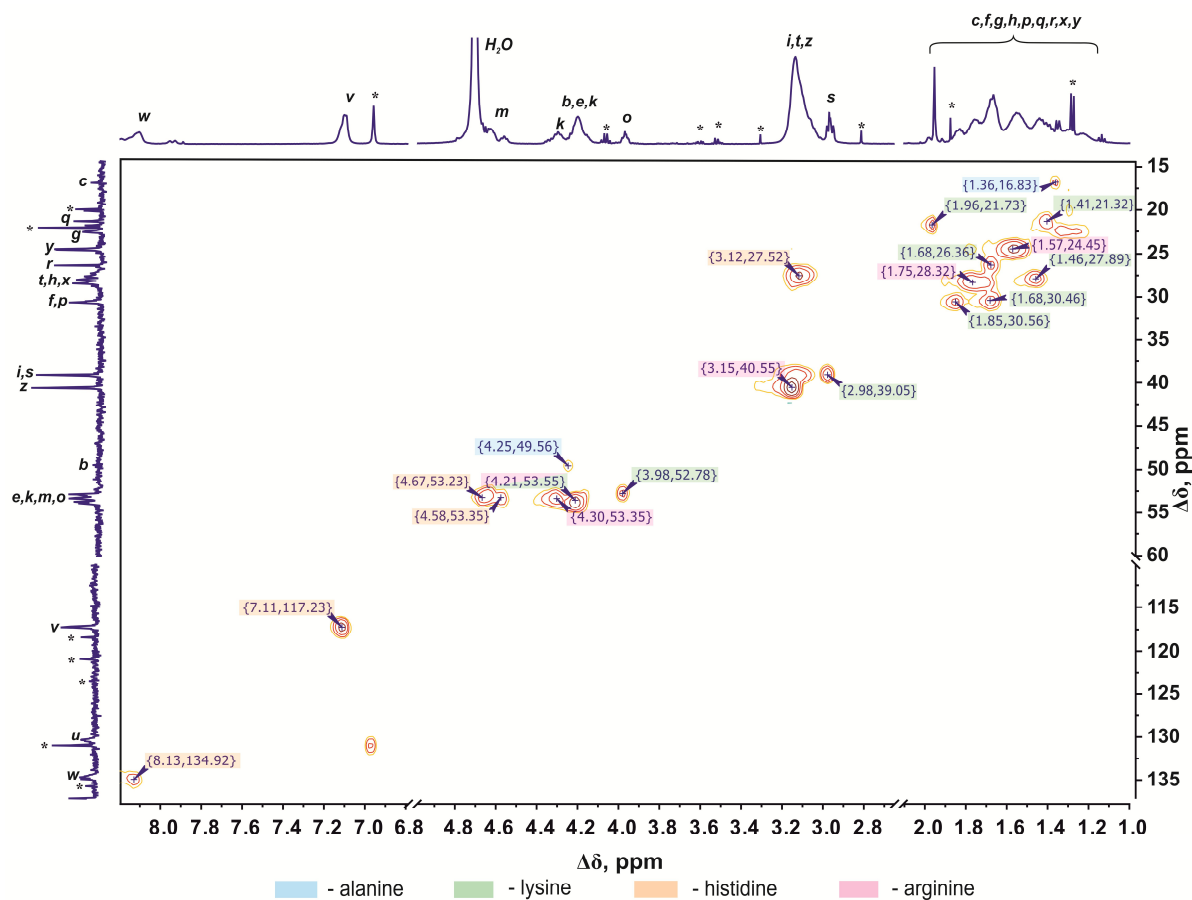

**Figure S1.**  $^1\text{H}$ - $^{13}\text{C}$  HSQC NMR spectrum of the Lys-Arg-His dendrimer at 298 K. The peaks from small molecular weight impurities are marked by\*.

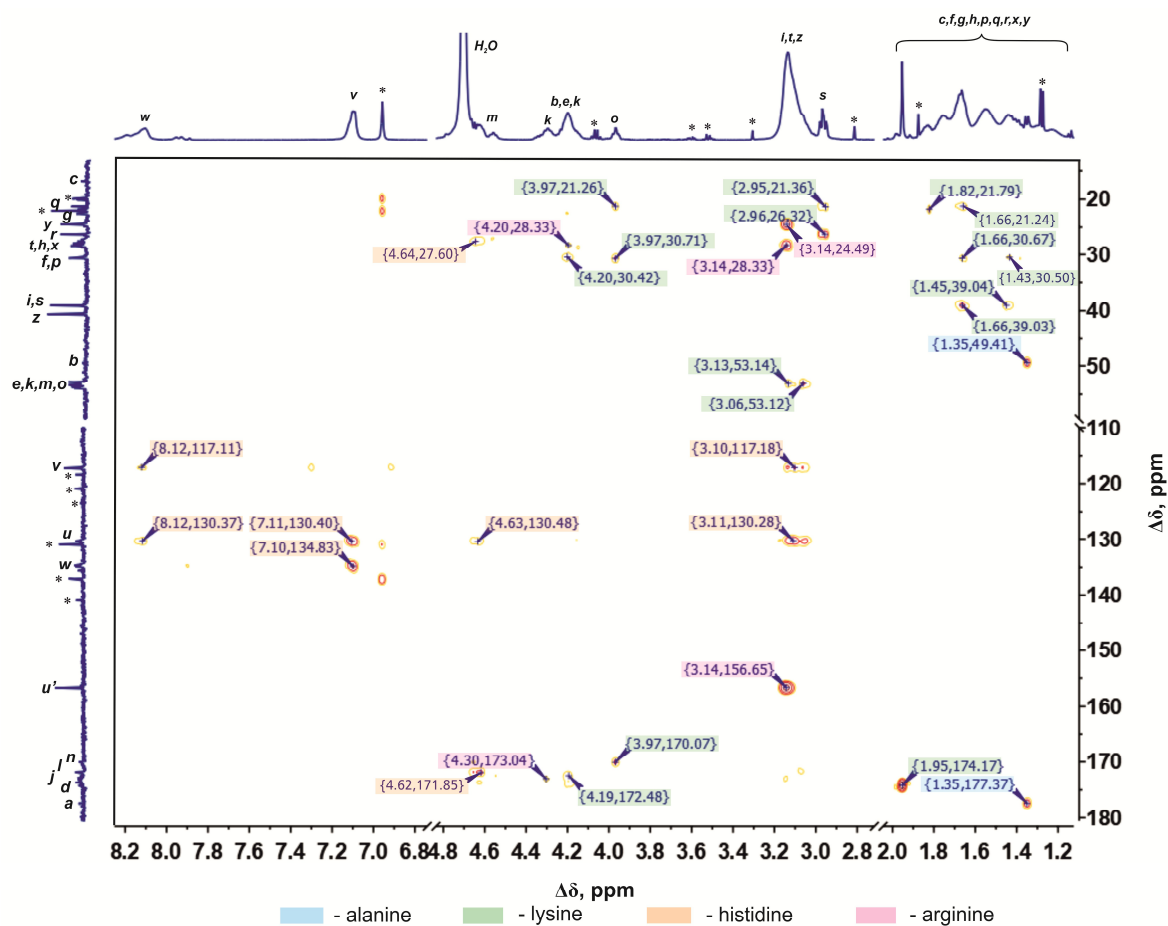

**Figure S2.**  $^1\text{H}$ - $^{13}\text{C}$  HMBC NMR spectrum of the Lys-Arg-His dendrimer at 298 K. The peaks from small molecular weight impurities are marked by\*.

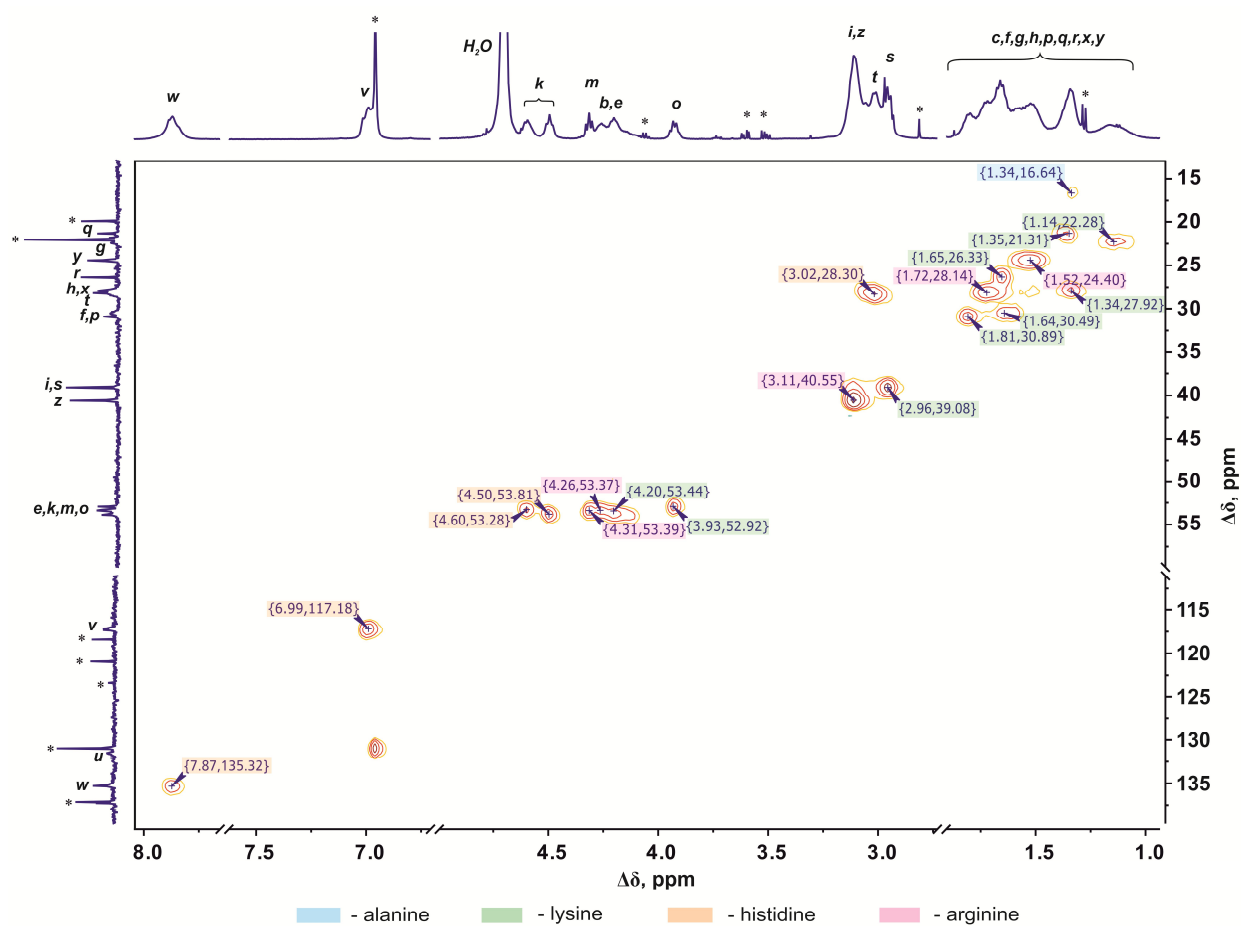

**Figure S3.**  $^1\text{H}$ - $^{13}\text{C}$  HSQC NMR spectrum of the Lys-His-Arg dendrimer at 298 K. The peaks from small molecular weight impurities are marked by\*.

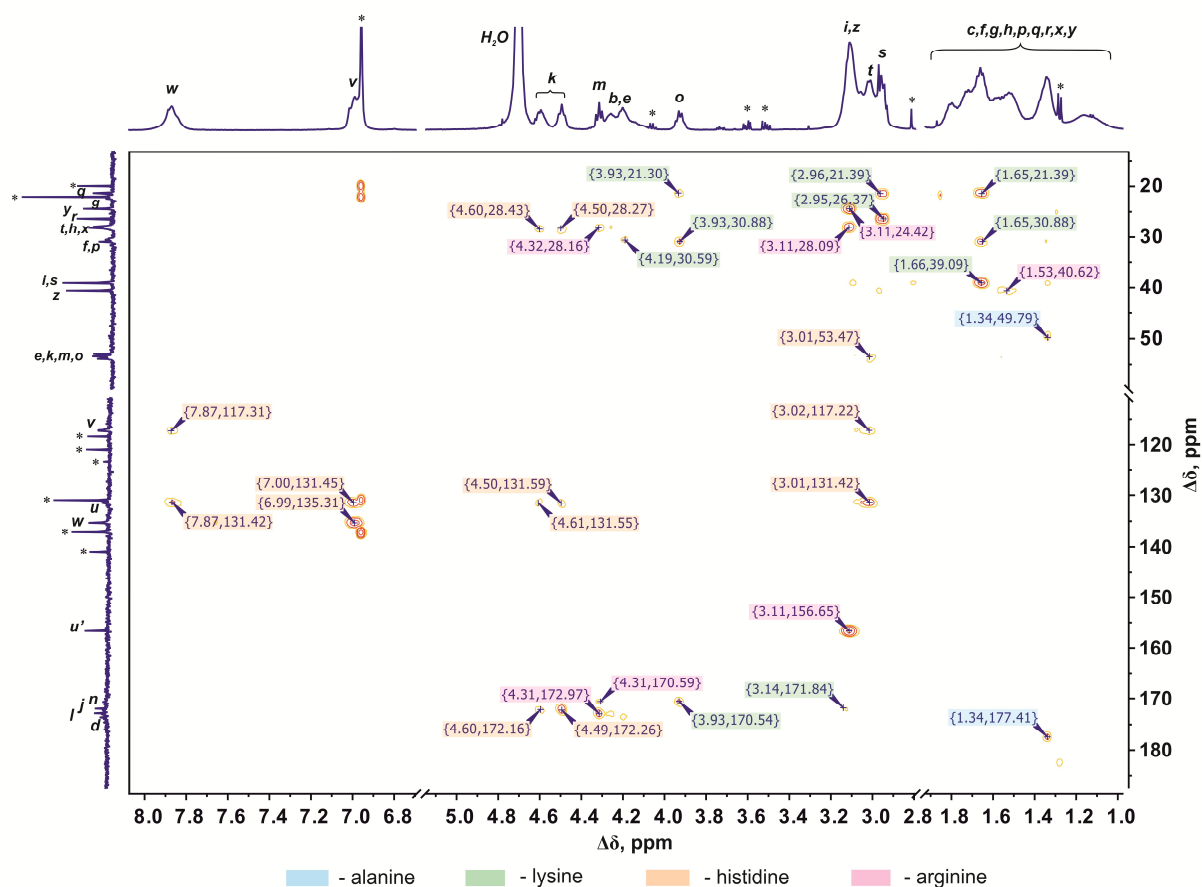

**Figure S4.**  $^1\text{H}$ - $^{13}\text{C}$  HMBC NMR spectrum of the Lys-His-Arg dendrimer at 298 K. The peaks from small molecular weight impurities are marked by\*.
